# Supplementary material for: Utilizing single-cell RNA sequencing for analyzing the characteristics of PBMC in patients with Kawasaki disease
Source: BMC Pediatr. 2021 Jun 14;21:277. doi: 10.1186/s12887-021-02754-5 (PMC8201934; doi:10.1186/s12887-021-02754-5)
Supplement: Supplementary file 2 — Additional file 2: Table S2. Different expression genes in B cell and T cell. [file 12887_2021_2754_MOESM2_ESM.xlsx]

## Sheet: Sheet3
Table S2 Different expression genes in B cell and T cell
Gene	Avgerage log2Fold Change (KD/Normal)	P value adjust	Cell Cluster
GNLY	2.23833	0	NKT cell
GZMB	1.8137	0	NKT cell
CLIC3	1.61553	0	NKT cell
FCGR3A	1.41138	0	NKT cell
FGFBP2	1.36161	0	NKT cell
FCER1G	1.31827	0	NKT cell
HOPX	1.2724	0	NKT cell
TYROBP	1.19851	0	NKT cell
LAIR2	1.19162	0	NKT cell
CCL4	1.15393	0	NKT cell
IGFBP7	1.02974	0	NKT cell
XCL2	0.94144	0	NKT cell
KLRC1	0.933706	0	NKT cell
GZMH	0.868296	0	NKT cell
SRGN	0.862378	0	NKT cell
MYBL1	0.812145	0	NKT cell
RHOC	0.785627	0	NKT cell
CD38	0.77184	0	NKT cell
GSTP1	0.61708	0	NKT cell
HSPA5	0.587947	0	NKT cell
CTSC	0.525846	0	NKT cell
XBP1	0.525095	0	NKT cell
B3GNT7	0.506226	0	NKT cell
CMC1	0.911712	4.29734e-304	NKT cell
SYNGR1	0.727299	1.46365e-294	NKT cell
CD160	0.719949	3.98081e-261	NKT cell
ID2	0.674244	1.3564e-255	NKT cell
CEP78	0.803627	8.3775e-255	NKT cell
TNFRSF18	0.524602	2.91416e-236	NKT cell
ZEB2	0.508337	3.9228e-198	NKT cell
ALOX5AP	0.63504	6.23213e-195	NKT cell
AKR1C3	0.715808	2.37138e-164	NKT cell
ABI3	0.521569	9.83822e-148	NKT cell
NR4A2	0.51065	6.62468e-126	NKT cell
NCAM1	0.636731	1.21876e-121	NKT cell
PRDM1	0.541093	1.99857e-73	NKT cell
PTGDS	0.600173	2.01804e-52	NKT cell
CCR7	1.49197	0	Naive CD8+ T cell
LEF1	1.39799	0	Naive CD8+ T cell
IL7R	1.37501	0	Naive CD8+ T cell
LDHB	1.29804	0	Naive CD8+ T cell
IL6ST	1.24575	0	Naive CD8+ T cell
TCF7	1.241	0	Naive CD8+ T cell
MYC	1.21698	0	Naive CD8+ T cell
RCAN3	1.20331	0	Naive CD8+ T cell
MAL	1.14641	0	Naive CD8+ T cell
RGS10	1.08	0	Naive CD8+ T cell
CAMK4	1.06238	0	Naive CD8+ T cell
TRAT1	1.01643	0	Naive CD8+ T cell
NOSIP	1.01456	0	Naive CD8+ T cell
SELL	1.00214	0	Naive CD8+ T cell
SOCS3	0.970449	0	Naive CD8+ T cell
OXNAD1	0.927844	0	Naive CD8+ T cell
TRABD2A	0.906643	0	Naive CD8+ T cell
LTB	0.896908	0	Naive CD8+ T cell
RPS8	0.874939	0	Naive CD8+ T cell
RPS12	0.870954	0	Naive CD8+ T cell
RPS18	0.852642	0	Naive CD8+ T cell
CD3D	0.814635	0	Naive CD8+ T cell
ITGA6	0.771079	0	Naive CD8+ T cell
ITM2A	0.743242	0	Naive CD8+ T cell
RPS6	0.73972	0	Naive CD8+ T cell
RPLP0	0.732963	0	Naive CD8+ T cell
RNASET2	0.717632	0	Naive CD8+ T cell
PIM1	0.648328	0	Naive CD8+ T cell
CD27	0.643663	0	Naive CD8+ T cell
PCED1B	0.641985	0	Naive CD8+ T cell
NGFRAP1	0.640512	0	Naive CD8+ T cell
INPP4B	0.618929	0	Naive CD8+ T cell
NFKBIZ	0.603887	0	Naive CD8+ T cell
ADTRP	0.597184	0	Naive CD8+ T cell
PPA1	0.56655	0	Naive CD8+ T cell
ICOS	0.563088	0	Naive CD8+ T cell
FAM134B	0.55407	0	Naive CD8+ T cell
PDK1	0.541088	0	Naive CD8+ T cell
C14orf64	0.510113	0	Naive CD8+ T cell
CD3G	0.513698	1.48995e-295	Naive CD8+ T cell
CD69	0.507113	9.62046e-243	Naive CD8+ T cell
FYB	0.630438	1.10254e-193	Naive CD8+ T cell
C1orf228	0.592883	7.66764e-192	Naive CD8+ T cell
PRKCQ-AS1	0.728069	2.01014e-179	Naive CD8+ T cell
BCL11B	0.682939	6.41811e-39	Naive CD8+ T cell
TESPA1	0.50854	4.31478e-38	Naive CD8+ T cell
ACTN1	0.577067	2.12389e-33	Naive CD8+ T cell
KLRG1	1.64536	0	T helper cell
GZMK	1.30627	0	T helper cell
CD3G	1.27069	0	T helper cell
CCL5	1.26281	0	T helper cell
CD3D	1.17445	0	T helper cell
DUSP2	1.1302	0	T helper cell
IL32	1.07604	0	T helper cell
PTMS	0.856022	0	T helper cell
IL7R	0.648381	0	T helper cell
CD27	0.588815	0	T helper cell
LAG3	0.547968	0	T helper cell
S100A4	0.575287	8.95214e-303	T helper cell
GZMH	0.73005	7.81496e-302	T helper cell
C12orf75	0.584324	1.96326e-173	T helper cell
ANXA1	0.610365	2.95531e-150	T helper cell
S100A10	0.511461	2.07086e-127	T helper cell
TNFAIP3	0.546457	6.40883e-127	T helper cell
EZR	0.583856	3.8851e-112	T helper cell
A2M-AS1	0.516054	4.61634e-33	T helper cell
CD84	0.553415	5.86391e-16	T helper cell
HLA-DRA	2.72972	0	B cell
MS4A1	2.7032	0	B cell
CD79A	2.59381	0	B cell
CD74	2.44683	0	B cell
HLA-DQB1	2.16773	0	B cell
HLA-DRB5	2.12902	0	B cell
HLA-DQA1	2.11245	0	B cell
BANK1	2.06865	0	B cell
TCL1A	2.0522	0	B cell
HLA-DPB1	2.01288	0	B cell
CD79B	1.99446	0	B cell
FCRL1	1.97433	0	B cell
YBX3	1.96813	0	B cell
HLA-DMA	1.96629	0	B cell
MEF2C	1.96078	0	B cell
HLA-DPA1	1.92472	0	B cell
LINC00926	1.88795	0	B cell
HLA-DRB1	1.8755	0	B cell
HLA-DQA2	1.80469	0	B cell
HVCN1	1.66111	0	B cell
CD37	1.62084	0	B cell
NCF1	1.58317	0	B cell
VPREB3	1.58236	0	B cell
P2RX5	1.53472	0	B cell
MARCH1	1.49485	0	B cell
RALGPS2	1.47935	0	B cell
FCER2	1.47928	0	B cell
SNX2	1.41107	0	B cell
HLA-DMB	1.40604	0	B cell
PPAPDC1B	1.36766	0	B cell
STX7	1.36009	0	B cell
AFF3	1.35147	0	B cell
LTB	1.31918	0	B cell
EAF2	1.3137	0	B cell
IRF8	1.31265	0	B cell
FAM129C	1.28785	0	B cell
FAM26F	1.18624	0	B cell
BIRC3	1.15324	0	B cell
SPIB	1.1446	0	B cell
FCRLA	1.14234	0	B cell
FCRL2	1.14117	0	B cell
RP11-693J15.5	1.13854	0	B cell
SWAP70	1.13301	0	B cell
GAPT	1.11697	0	B cell
CD40	1.1148	0	B cell
BASP1	1.10893	0	B cell
COBLL1	1.06389	0	B cell
CD19	1.05385	0	B cell
PDLIM1	1.04344	0	B cell
CD72	1.0366	0	B cell
MTSS1	0.9904	0	B cell
BTK	0.956909	0	B cell
TSPAN13	0.949159	0	B cell
CYBB	0.90743	0	B cell
BLK	0.904766	0	B cell
ORAI2	0.902911	0	B cell
BLNK	0.899836	0	B cell
PPP1R14A	0.897752	0	B cell
CYB561A3	0.897094	0	B cell
LY86	0.856103	0	B cell
FCGR2B	0.844656	0	B cell
HHEX	0.836713	0	B cell
RNASE6	0.833104	0	B cell
GNG7	0.822296	0	B cell
IFNGR2	0.799502	0	B cell
PKIG	0.798674	0	B cell
RP11-164H13.1	0.782967	0	B cell
FCRL5	0.743556	0	B cell
MARCKS	0.739513	0	B cell
CDCA7L	0.726219	0	B cell
KIAA0226L	0.645931	0	B cell
LYL1	0.598783	0	B cell
CIITA	0.529825	0	B cell
WDFY4	0.529077	0	B cell
NCF4	0.52523	0	B cell
POU2AF1	0.520072	0	B cell
BCL11A	1.25353	4.66709e-302	B cell
PAX5	0.954042	5.78304e-302	B cell
CXCR4	1.24228	9.44143e-301	B cell
CTA-250D10.23	0.729605	2.98587e-294	B cell
TP53INP1	0.781937	2.25885e-292	B cell
SEL1L3	0.871096	5.14924e-289	B cell
QRSL1	0.634581	1.98784e-284	B cell
KMO	0.628522	3.54143e-283	B cell
IL4R	1.23921	1.27088e-280	B cell
PHACTR1	0.543811	4.84789e-276	B cell
POU2F2	1.19599	8.28058e-274	B cell
IGLL5	1.38083	1.9273e-269	B cell
CD22	1.07604	9.26022e-265	B cell
USP6NL	0.553775	1.07781e-264	B cell
OPN3	0.546942	3.59725e-264	B cell
SCIMP	0.807645	1.46825e-249	B cell
SNX22	0.692257	1.33225e-248	B cell
SMIM14	1.06666	1.5658e-244	B cell
CD83	0.806991	8.29792e-244	B cell
C16orf74	0.740592	7.04356e-233	B cell
SAV1	0.544435	8.75809e-230	B cell
RAB30	0.875994	3.953e-229	B cell
FCHSD2	0.631371	7.00005e-227	B cell
CHPT1	0.747245	5.23608e-221	B cell
ADAM19	0.670861	5.50441e-221	B cell
SCPEP1	0.589268	1.39184e-220	B cell
CTSH	0.548623	8.34885e-218	B cell
TPD52	0.761946	6.45245e-192	B cell
BACH2	0.932413	6.03663e-190	B cell
TLR10	0.672381	3.35476e-184	B cell
HDAC9	0.556834	5.27831e-174	B cell
PLEKHO1	0.639884	1.29036e-171	B cell
FAM96A	0.650915	9.03065e-159	B cell
KIAA1033	0.655886	2.47246e-135	B cell
PPM1K	0.622218	5.45339e-133	B cell
ALOX5	0.659983	7.60334e-131	B cell
ZFP36L1	0.847818	1.19362e-130	B cell
BCL7A	1.07813	1.08126e-127	B cell
CCDC50	0.585209	1.01732e-120	B cell
HERPUD1	0.677917	1.09344e-120	B cell
PDE4B	0.622657	5.74842e-117	B cell
DNAJC10	0.553884	6.10093e-110	B cell
LYN	0.532426	2.16686e-100	B cell
KIAA0040	0.551962	3.91066e-96	B cell
MIS18BP1	0.566562	6.434e-91	B cell
OSBPL10	0.588455	1.05953e-88	B cell
EVI2B	0.512734	2.33212e-82	B cell
TMEM156	0.75555	6.64357e-81	B cell
DUSP1	0.547347	1.04548e-75	B cell
DAPP1	0.86342	3.77387e-75	B cell
IFT57	0.524477	5.97488e-68	B cell
NCOA3	0.645772	1.04888e-64	B cell
JUN	0.590026	5.80252e-63	B cell
ISG20	0.515676	1.89036e-59	B cell
FAM3C	0.684404	6.01209e-55	B cell
CD55	0.527711	4.04781e-51	B cell
CD69	0.53957	6.03307e-50	B cell
ARID5B	0.52653	1.08616e-48	B cell
ADAM28	0.875137	3.97593e-48	B cell
STRBP	0.926878	1.02405e-44	B cell
TMEM154	0.746992	8.03974e-40	B cell
TCF4	0.996983	2.36208e-37	B cell
CPNE5	0.689694	2.14572e-11	B cell
KIAA0125	0.709124	3.32722e-10	B cell
EBF1	0.789678	2.36563e-06	B cell
CCR7	1.17208	1.82467e-223	Naive T cell
MAL	0.687768	4.98164e-209	Naive T cell
RPS18	0.757876	1.91931e-199	Naive T cell
RPS12	0.686928	1.78374e-180	Naive T cell
LEF1	1.04107	5.47739e-180	Naive T cell
RPS6	0.713673	2.67905e-169	Naive T cell
ITGA6	0.607316	1.50899e-168	Naive T cell
TRABD2A	0.818899	1.61214e-167	Naive T cell
RPS8	0.686599	3.36066e-154	Naive T cell
RGS10	1.09464	1.9355e-145	Naive T cell
MYC	0.724593	5.36634e-143	Naive T cell
CD27	0.790204	5.2267e-142	Naive T cell
CD8B	1.60126	2.91437e-137	Naive T cell
PCED1B	0.649229	3.7934e-136	Naive T cell
CAMK4	0.614478	6.81813e-132	Naive T cell
RCAN3	0.836173	9.87885e-119	Naive T cell
IL7R	0.790112	1.39874e-116	Naive T cell
CD3D	0.783105	2.7651e-115	Naive T cell
NOSIP	0.973113	1.40018e-96	Naive T cell
SELL	0.998798	3.79996e-91	Naive T cell
PRKCQ-AS1	0.687951	1.35598e-77	Naive T cell
C1orf228	0.908634	6.77406e-75	Naive T cell
LDHB	0.788352	8.91725e-74	Naive T cell
PPA1	0.578499	2.35436e-73	Naive T cell
OXNAD1	0.716254	6.52714e-62	Naive T cell
RPLP0	0.502417	8.39768e-59	Naive T cell
CD8A	0.886459	4.5673e-53	Naive T cell
THEMIS	0.640041	2.25204e-48	Naive T cell
GPR155	0.634047	5.02e-45	Naive T cell
S100B	0.625557	1.70027e-32	Naive T cell
SNORA76	0.550063	1.13592e-28	Naive T cell
TCF7	0.649082	1.06609e-23	Naive T cell
RP11-291B21.2	1.05408	1.25351e-06	Naive T cell
